# Supplementary material
Source: publisher site journal article supplement (https://www.degruyter.com/publication/isbn/9783110349467/downloadAsset/9783110349467_Content.pdf)
Supplement: Supplementary file 1 [file 9783110349467_Content.pdf]

# Table of Contents

Willem H van Boom

- 1 Mass Torts: Debates and Pathways — 1**
  - I. Setting the Scene — 1
  - II. Concepts and Basic Legal Issues — 2
  - III. Debates and Pathways — 8
    - A. The Debate in Europe — 8
    - B. Pathways — 10
  - IV. The Contributions to this Book — 12
    - A. Cases and Reflections — 12
    - B. Case Studies — 13
      - 1. Several events with a common cause — 14
      - 2. One event with multiple victims — 15
      - 3. Multinationals and multi-district actions — 16
      - 4. Financial markets and mass damage — 16
    - C. Academic Reflections — 18
  - V. Final Considerations — 20

Nadia Coggiola and Michele Graziadei

- 2 The Italian ‘Eternit Trial’: Litigating Massive Asbestos Damage in a Criminal Court — 23**
  - I. Introduction — 23
  - II. Facts of the Case — 25
    - A. The Accusations — 25
    - B. The Stakeholders — 26
    - C. Public Resonance — 27
    - D. Jurisdictions Involved — 28
    - E. The Main Legal Questions — 30
    - F. Out-of-Court Procedure — 33
    - G. Court Procedure: The Proceeding of the Trial — 33
    - H. Court Procedure: The First Instance Court Findings of Fact — 34
    - I. Court Procedure: The Trial and Appellate Court Decisions — 37

Melissa R Ferrari

- 3 Silicone Breast Implants: Mass Tort and Massive Damage in Europe — 47**
  - I. Introduction — 47
    - A. A Brief History of Implants and the US Litigation — 49
    - B. Meanwhile in Europe ... — 53
  - II. Legal Issues, Negotiations, and Resolutions — 60
    - A. The Multi-District Litigation Settlement — 60
    - B. The Dow Corning Corporation Bankruptcy Proceeding — 65
  - III. Conclusion — 71

Claudio Perrella

**4 The 'Costa Concordia' Case — 73**

- I. Foreword — 73
- II. The Wreck Removal Operations — 74
- III. The Impact on the Local Industry and the Legal Issues at Stake — 75
- IV. Liability Regime Applying to the Actions Brought by the Passengers — 76
- V. Damage Assessment for Bodily Injury in Italian Case Law — 79
- VI. Costa's Right to Limitation of Liability — 81
- VII. Class Actions and Punitive Damages — 83
- VIII. The Possible Damage to the Environment Arising from the Spill of Bunker Oil — 86

Otto Ernst Krasney

**5 Ombudsman for the Victims of the Rail Accident at Eschede on 3 June 1998 — 89**

- I. Appointment of the Ombudsman — 89
- II. Responsibilities of the Ombudsman — 89
- III. Position of the Ombudsman — 90
- IV. The Work of the Ombudsman — 91
  - A. Extensive Personal Assistance — 91
  - B. Offer of Legal Aid and Community of Interests — 91
  - C. Psychological Help and Treatment — 92
  - D. Help for the Helpers — 92
  - E. Compensation for People Affected — 93
- V. Conclusion — 94

Hermes Marangos

**6 International Environmental Mass Litigation in the UK — 95**

- I. Introduction — 95
- II. Facts of the Case — 96
- III. Legal Liability — 96
- IV. Damages Rules — 98
- V. Similar Cases — 99
  - A. BP Oil Spill Colombia — 99
  - B. Lubbe and Others v Cape Plc — 100
  - C. Afrika and Others v Cape plc — 101
  - D. Adam v Cape Industries Plc — 103
- VI. Conclusion — 103

Philip Tansley

**7 South African Silicosis Litigation in London. A Case Study — 105**

- I. What is Silicosis? — 105
- II. Silicosis in South Africa — 106

- III. The Litigation — 107
  - A. The Stakeholders — 107
  - B. Collective Actions in England and Wales — 109
  - C. The Allegations — 110
  - D. The London Proceedings — 110
  - E. Why London? — 111
- IV. Jurisdictional Issues — 113
- V. What Next? — 114
- VI. Lessons for the Future — 115

Francesca Rolla and Filippo Chiaves

## **8 Bank Charges — 117**

- I. General Introduction — 117
  - A. The New Class Action Law — 117
  - B. Italian Class Action Proceedings — 118
  - C. Class Actions for Bank Charges — 120
- II. Overview of the Case — 121
  - A. The Plaintiffs — 121
  - B. The Defendant — 121
  - C. The Class Action Suit — 121
- III. Dynamics of the Case and Legal Issues Involved – The First Instance Proceedings — 123
  - A. Plaintiffs' Claims — 123
  - B. The First Instance Decision by the Turin Court — 124
- IV. Dynamics of the Case and Legal Issues Involved – The Appeal Proceedings — 126
  - A. Grounds of the Appeal — 126
  - B. The Decision of the Turin Court of Appeals — 126
  - C. Further Progress of the Class Action — 128
- V. Conclusions — 129

Andreas W Tilp and Thomas A Roth

## **9 The German Capital Market Model Proceedings Act as Illustrated by the Example of the Frankfurt Deutsche Telekom Claims — 131**

- I. Introduction — 131
- II. The Facts of the Case — 132
  - A. Actors Involved in the Litigation — 132
  - B. Actors not Involved in the Litigation — 133
- III. Proceedings — 134
  - A. Out-of-Court Proceedings — 134
  - B. Judicial Proceedings Prior to Entry into Force of the KapMuG — 135
  - C. KapMuG Proceedings — 135
- IV. Legal Issues — 138
  - A. Competent Courts — 138
  - B. The Central Questions of Law — 139

- 1. The original material questions — 139
- 2. Questions of procedural law — 139
- 3. Other substantive questions of law — 140
- V. Summary — 141

Jenny Boldon

**10 The Madoff Ponzi Scheme — 143**

- I. Background — 143
- II. The Aftermath — 144
- III. The US — 145
  - A. Trustee Recoveries/Clawback Claims — 145
  - B. Restitutionary Claims against Investors by Feeder Funds — 147
  - C. Investor Claims — 147
  - D. Regulatory Aspects — 147
  - E. Criminal Prosecutions — 148
- IV. The European Landscape — 148
  - A. England and Wales — 149
    - 1. Requests for information — 149
    - 2. Jurisdiction — 150
    - 3. Enforcement — 151
    - 4. MSIL Liquidator Action against MSIL Directors and Others — 151
  - B. Spain — 152
  - C. Ireland — 152
  - D. Luxembourg — 154
  - E. Switzerland — 154
  - F. Austria — 154
- V. Insurance Issues — 155
- VI. The Market for Madoff Claims — 155
- VII. Conclusion — 156

Harald Koch

**11 Mass Damage in Europe: Aggregation of Claims, Effective Enforcement and Adequate Representation — 157**

- I. Introduction — 157
  - A. Relevance and Notion of Mass Damage — 157
  - B. European Initiatives — 157
  - C. Double Meaning of ‘Damage’ and Claims Mentality — 158
- II. Focus: Damage as a Result of Mass Torts — 159
- III. Effective Enforcement of Mass Damage Claims — 159
  - A. Functions of Mass Damage Enforcement — 160
  - B. Effectiveness and Efficiency — 161
- IV. Suitable Ways to Handle Mass Damages Claims Procedurally — 162
  - A. Out-of-Court Negotiations, ADR, Arbitration — 162
  - B. Individual Pursuit of Claims, Test Litigation, and its Relevance for other Claims — 163

- C. Aggregation of Claims — 164
  - 1. Joinder — 164
  - 2. Assignment — 165
  - 3. Court controlled representation — 166
- D. Adequate Representation — 166
  - 1. Conflict of interests — 166
  - 2. Representative's authority — 167
- E. Notice to all Parties Potentially Affected — 168
  - 1. Notice of representation — 168
  - 2. Notice of settlement and appropriation of award — 169
- F. Financing Mass Litigation — 169
- V. Coping with Mass Damages outside the Law: Delegalisation? — 170

Bernhard A Koch

- 12 Multiple Tortfeasors in Mass Tort Cases — 173**
  - I. Introduction — 173
  - II. Range of Possible Outcomes — 174
    - A. No Liability of Any Defendant — 174
    - B. Full Liability of one Defendant — 176
    - C. Proportional Liability of Some or All Defendants — 177
      - 1. Proportional liability in general — 177
      - 2. Loss of a chance — 178
    - D. Several Liability of Some or all Defendants — 179
    - E. Joint and Several (Solidary) Liability of Some or All Defendants — 180
      - 1. Solidary liability — 180
      - 2. Contribution (recourse) — 181
    - F. Alternative Compensation Schemes — 183
  - III. Key Factors — 183
    - A. Causation — 183
      - 1. Categories of causal scenarios — 183
      - 2. Proportional liability as one potential outcome — 185
      - 3. Legal causation — 186
    - B. Type of Harm — 187
    - C. Link(s) between the Parties — 188
    - D. Bases of Liability — 189
    - E. Procedural Aspects — 190
    - F. Further Factors — 191
  - IV. Policy Arguments in the Mass Torts Scenario — 192
  - V. Conclusion — 195

Astrid Stadler

- 13 Mass Damages in Europe – Allocation of Jurisdiction – Cross-Border Multidistrict Litigation — 197**
  - I. Cross-Border Mass Torts and the Need for Forum Shopping — 197

- II. The Regulatory Framework of International Jurisdiction — 202
  - A. European Union – Regulation 44/2001 (the Brussels I Regulation) — 202
  - B. Mass Litigation on a Global Scale and the forum non conveniens Doctrine — 203
  - C. International Jurisdiction for Contentious Mass Litigation in the EU — 207
    - 1. Defendant's domicile — 207
    - 2. Tort cases — 211
    - 3. Contract cases — 212
    - 4. Choice-of-forum agreements — 213
  - D. Mass Settlements and the Brussels I Regulation — 215
    - 1. Settlements negotiated in the course of contentious court proceedings — 215
    - 2. Settlements without contentious litigation — 217
- III. The Future of Jurisdictional Rules over Mass Claims in Europe — 221
  - A. No Harmonisation of the Instruments of Collective Redress in the EU — 222
  - B. Harmonisation of the Instruments of Collective Redress and New Rules on International Jurisdiction — 228
- IV. Summary and Questions to be Discussed in the Future — 229

Christopher Hodges

**14 Delivering Redress through Alternative Dispute Resolution and Regulation — 231**

- I. Introduction — 231
- II. Describing the Mechanisms — 231
- III. Origins of the Alternative Techniques — 239
- IV. Predicting the Future — 241

Moritz Brinkmann

**15 Mass Tort Related Insolvency Proceedings: Choice of Jurisdiction, Treatment and Discharge of Tort Claims — 245**

- I. Introduction — 245
- II. Choice of Jurisdiction — 246
  - A. Choice of Jurisdiction with respect to the Insolvency Proceedings — 246
  - B. Decisions as to the Allowance of Claims – The Concept of Vis Attractiva Concursus — 249
    - 1. The determination of a lodged and contested claim — 250
    - 2. The effect of the opening of insolvency proceedings on pending trials — 251
- III. Treatment of Tort Creditors in Insolvency Proceedings — 252
  - A. Tort Creditors are General Creditors! (?) — 252

- B. Treatment of Insurance Policy Proceeds in Insolvency Proceedings — 253
      - 1. The effects of a direct action approach in insolvency — 254
      - 2. Earmarking of insurance policy proceeds — 254
  - IV. The Effects of a Discharge on the Position of Tort Creditors — 256
    - A. Discharge of Tort Claims in Principle — 256
    - B. Treatment of Tort Claims in Restructuring Plans – in Particular the Future Claimant Problem — 257
      - 1. Representation of future creditors' interests in plan proceedings — 257
      - 2. Depletion of the established trust — 259
  - V. Lessons to Be Learned From the Asbestos Bankruptcies — 260

Gerhard Wagner

- 16 Mass Tort Resolution: Competition Between Jurisdictions and Mechanisms — 263**
  - I. Introduction — 263
  - II. The Spectrum of Mechanisms and Fora — 265
    - A. Civil Procedure — 265
      - 1. The commission recommendation on collective redress — 265
      - 2. Lessons from the case studies — 266
    - B. Alternative Dispute Resolution — 269
      - 1. Ad hoc ADR — 270
      - 2. The broader picture of ADR — 271
    - C. Criminal Procedure — 272
      - 1. Priority of criminal over civil procedure — 272
      - 2. The Italian asbestos trial — 273
    - D. Insolvency Proceedings — 275
      - 1. Bankruptcy as the debtor's response to a mass of tort claims — 275
      - 2. Consolidation of claims via insolvency law — 275
      - 3. Externalities imposed on tort creditors — 278
  - III. A Functional Approach towards Institutions Designed for Mass Torts — 280
  - IV. Evaluation — 282
    - A. Civil Procedure: Aggregate Litigation — 282
    - B. ADR: Piece-Meal Dispute Resolution out of Court — 285
    - C. Dispute Resolution the Criminal Way — 287
    - D. Insolvency Law: Dealing with Scarcity — 288
  - V. Competition Between Modes and Fora of Dispute Resolution: Where Does the Race Lead? — 289
    - A. The Range of Choices Available to Forum Shopping Claimants — 289
    - B. The Supply Side: Responses by Lawmakers, Judges, and Respondents — 293
    - C. Evaluation of the Competition for the Resolution of Mass Tort Cases — 294
